# Supplementary material for: Sulfadiazine Exerts Potential Anticancer Effect in HepG2 and MCF7 Cells by Inhibiting TNFα, IL1b, COX-1, COX-2, 5-LOX Gene Expression: Evidence from In Vitro and Computational Studies
Source: MDPI journal article supplement (doi:10.3390/ph17020189), 2024-01-31
Supplement: s1 [file s1]

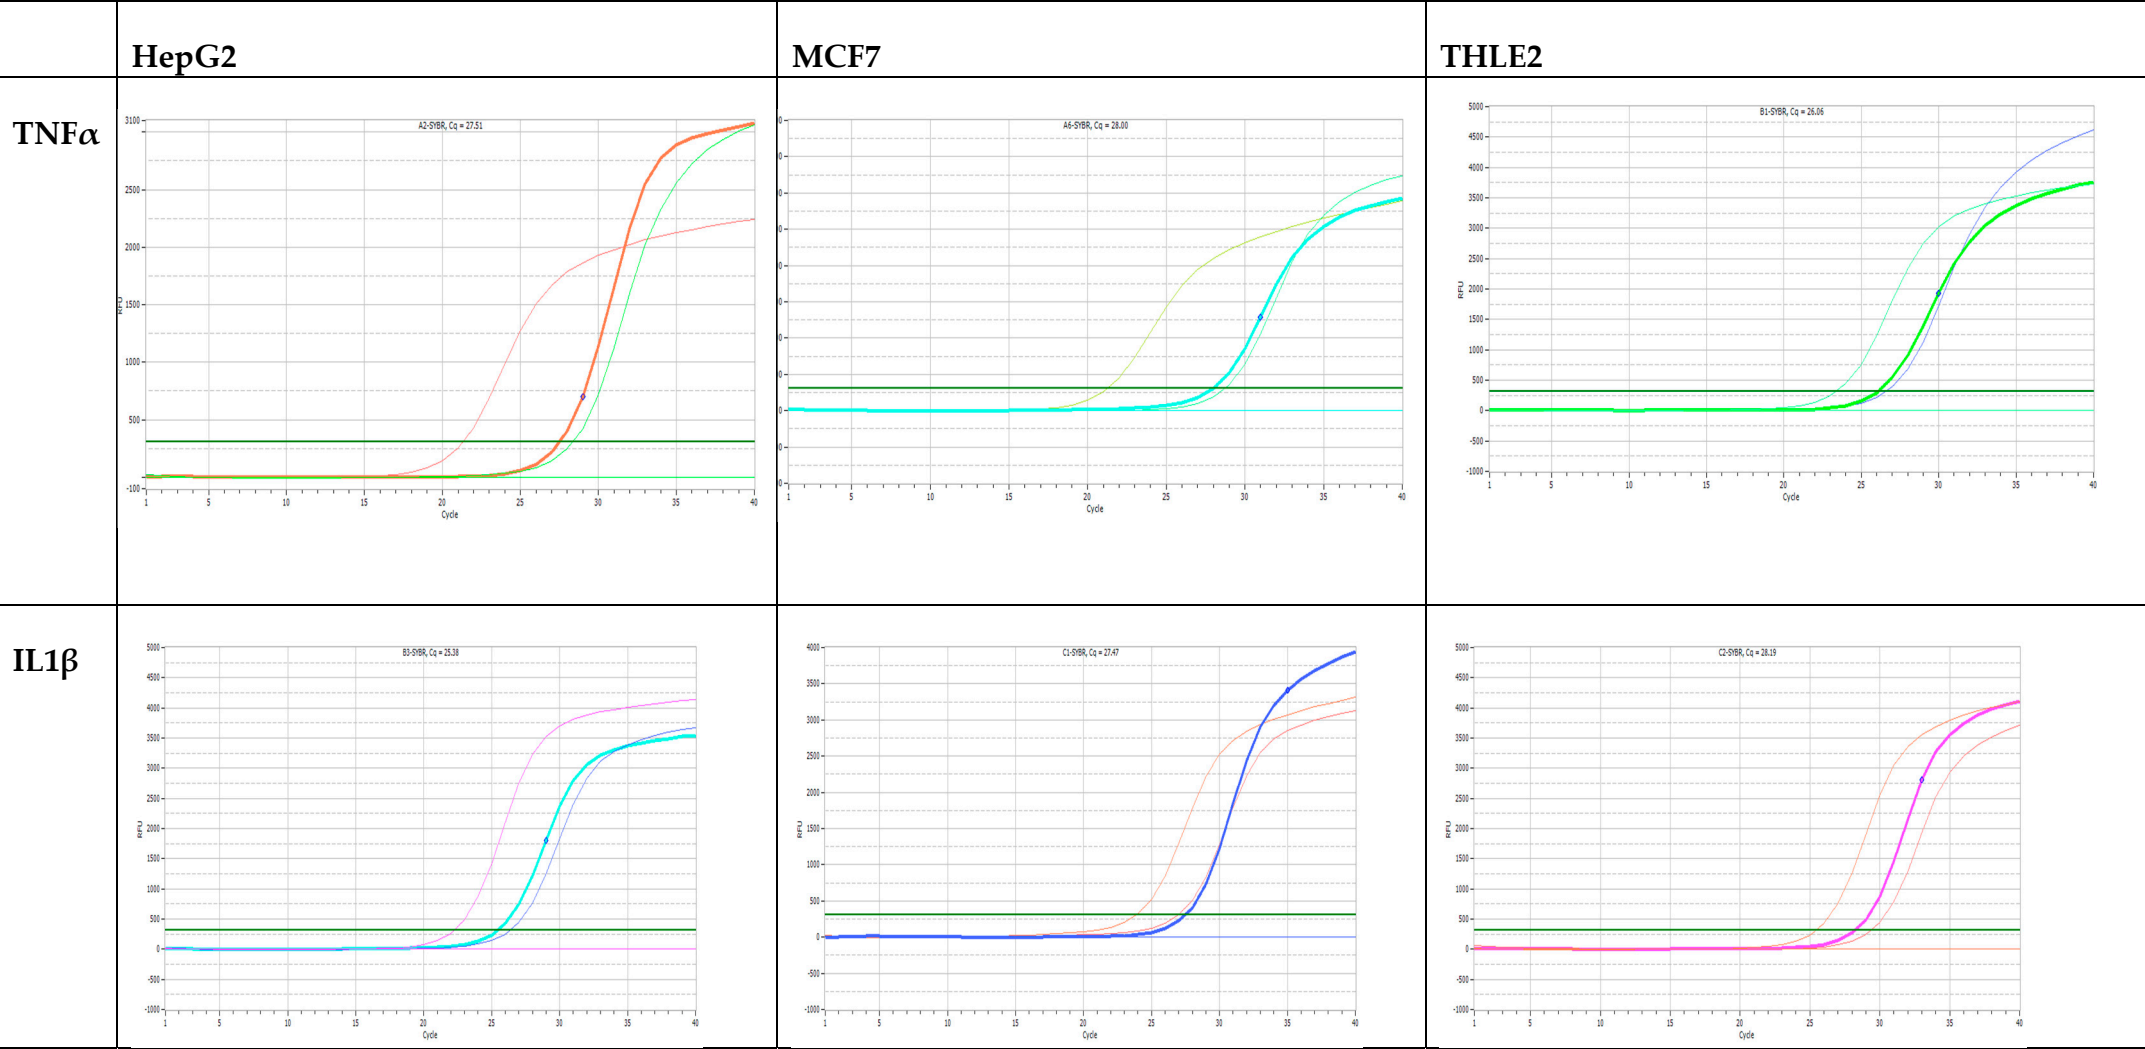

# COX-1

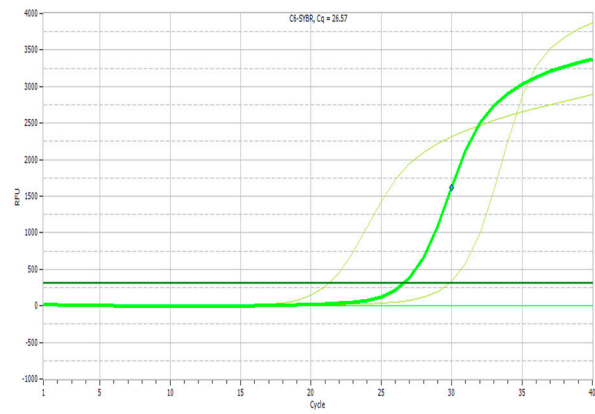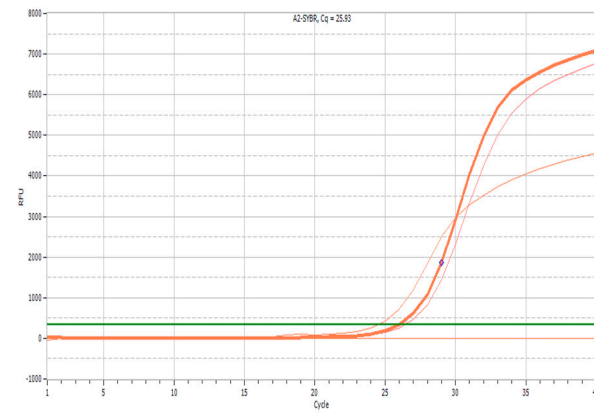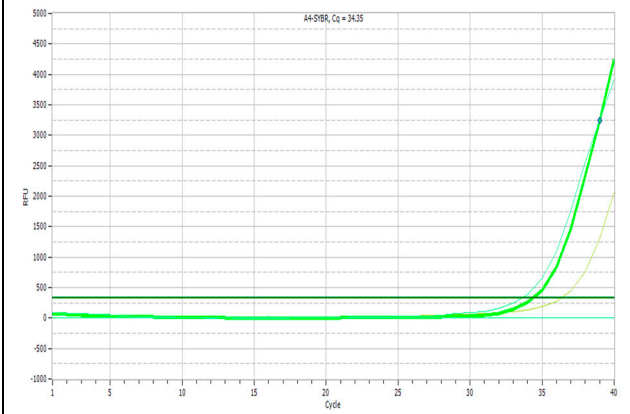

# COX-2

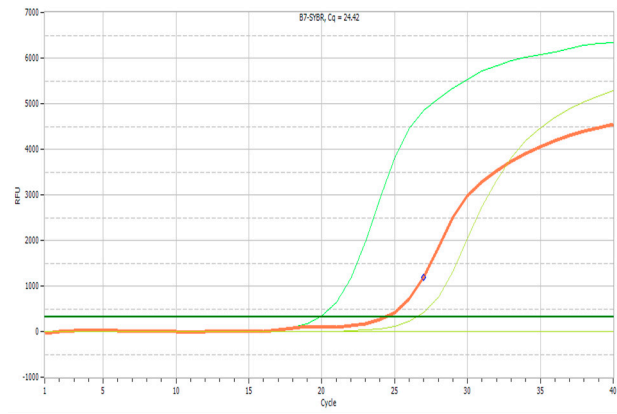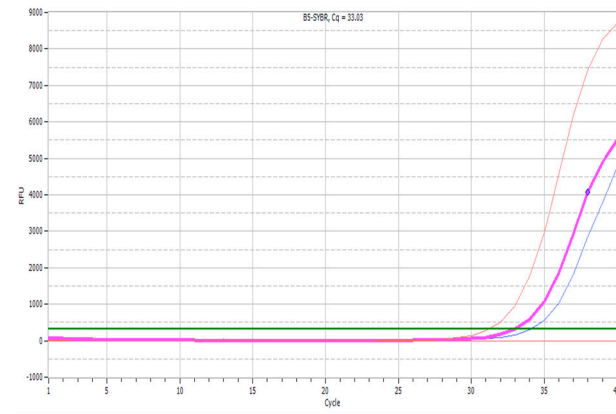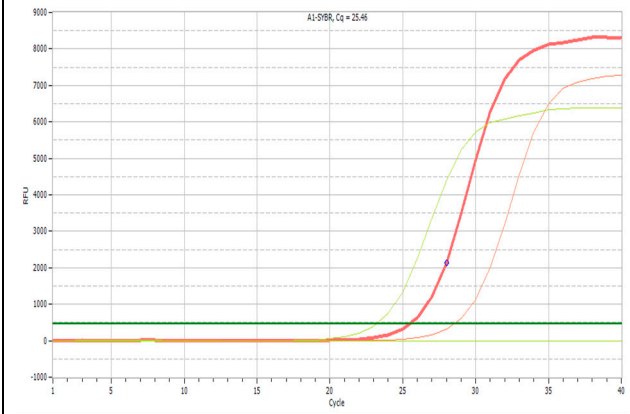

5LOX

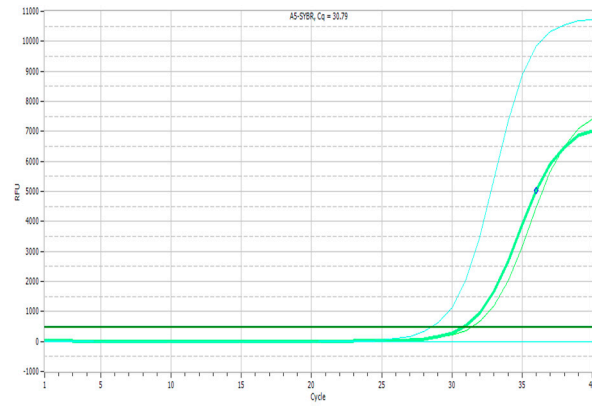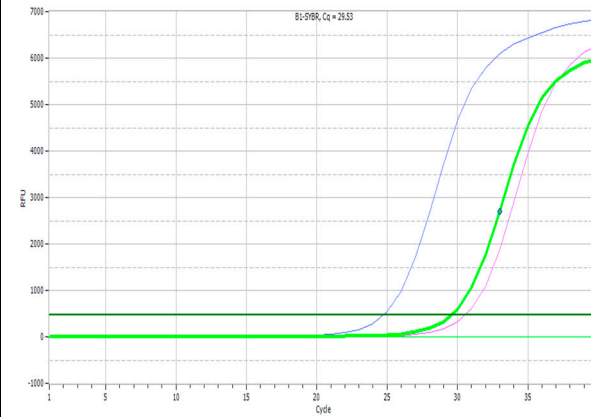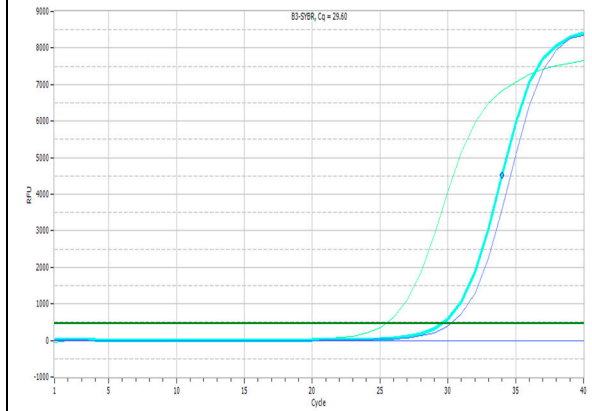

**Figure S1.** The set of curves obtained from G1 (control, vehicle-treated cells), G2 (untreated LPS-inflamed cells), and G3 (sulfadiazine-treated LPS-inflamed cells) for each of the five inflammation-related genes (TNF $\alpha$ , IL1 $\beta$ , COX-1, COX-2, 5LOX), plotted against the cycle number (x-axis) and fluorescence intensity (y-axis). The data was obtained from Real time PCR (qPCR) analysis.
